# Supplementary material for: A Dual-Function 'TRE-Lox" System for Genetic Deletion or Reversible, Titratable, and Near-Complete Downregulation of Cathepsin D
Source: Preprints.org preprint supplement (doi:10.20944/preprints202303.0543.v1), 2023-03-31
Supplement: Supplementary file 1 [file supplementary]

Supplemental Materials

for

A Dual-Function "TRE-Lox" System for Genetic Deletion or Reversible, Titratable, and Near-Complete Downregulation of Cathepsin D

Heather M. Terron1, Derek S. Maranan1,2, Luke A. Burgard1,2, Frank M. LaFerla1,2, Shelley Lane1 and Malcolm A. Leissring1,*

1 Institute for Memory Impairments and Neurological Disorders, University of California, Irvine, Irvine, CA 92697, USA

2 Department of Neurobiology and Behavior, University of California, Irvine, Irvine, CA 92697, USA

***** Correspondence: m.leissring@uci.edu

**Contents**

**pp. Fig./Table Title ­­­­**

2 Fig. S1 Targeted region of murine *CTSD* gene highlighting key elements.

3-4 Fig. S2 Targeted region after insertion of TRE-Lox KI insert with Puror cassette.

5 Fig. S3 Targeted region after Flp recombination.

6 Fig. S4 Targeted region after genetic deletion (recombination w/ Flp and Cre).

7 Fig. S5 Genotyping of TL1C8 line by sequencing.

8 Fig. S6 PCR verification before vs. after Flp-mediated recombination.

9 Fig. S7 Dox dose-response curves for stable clones TFR1B11 and TFR2E9.

10 Fig. S8 Time courses of CatD downregulation in clones TFR1B11 and TFR2E9 after addition of Dox (100 ng/mL).

11 Fig. S9 Effect of rtTR on CatD activity in the presence and absence of Dox (1000 ng/mL) in transient pools and stable clones of TL1C8-Flp cells.

12 Fig. S10 Steady-state CatD protein levels in MEFs vs. TFR1D7 cells and in response to Dox addition and withdrawal, using CatD-KO line C1C5 as a control.

13 Table S1 Primers used in this study.

**Supplementary Figure S1. Targeted region of murine *CTSD* gene highlighting key elements.**


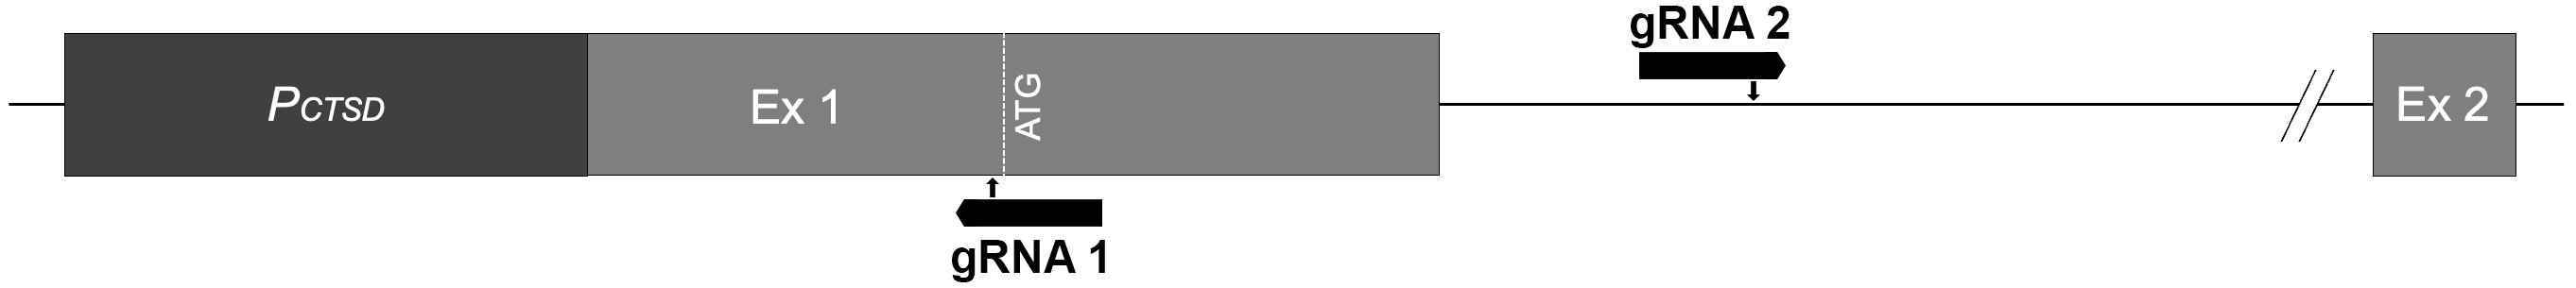


Promoter: lower-case gray

TATA Box: underlined

Transcript. start: ↱

EXON 1: UPPER-CASE BLACK

Introns: lower-case black

ATG site: OUTLINED

gRNA seqs: **BOLD BLACK**

gRNA orientation: horizontal arrows

PAM seqs: Yellow highlight

Cut site: ⇑

...acccgttgagggccaaacaagcgggtcagctgactccgcgggactgc

↱

ggcgtcatcctgcctATAAGCCGGCGACCTCTGGCTTTAAGCTTTGCTCT

CTTCGGG**CCGCCGCGACCATGAAGACTCCC**GGCGTCTTGCTGCTCATTCT ←----⇑---------------⤙

CGGCCTCCTGGCTTCGTCCTCCTTCGCGATTATCAGgtgaggacccgctc

⤚---------------⇓----⟶

tgggtccggagatgcggggctcgtc**acctggagtgccgcgtgctccgg**cc

gtgctggaatgcacctgtgcacccagcgcagccttcctcagggtccc...

**Supplementary Figure S2. Targeted region after insertion of TRE-Lox KI insert with Puror cassette.**

**
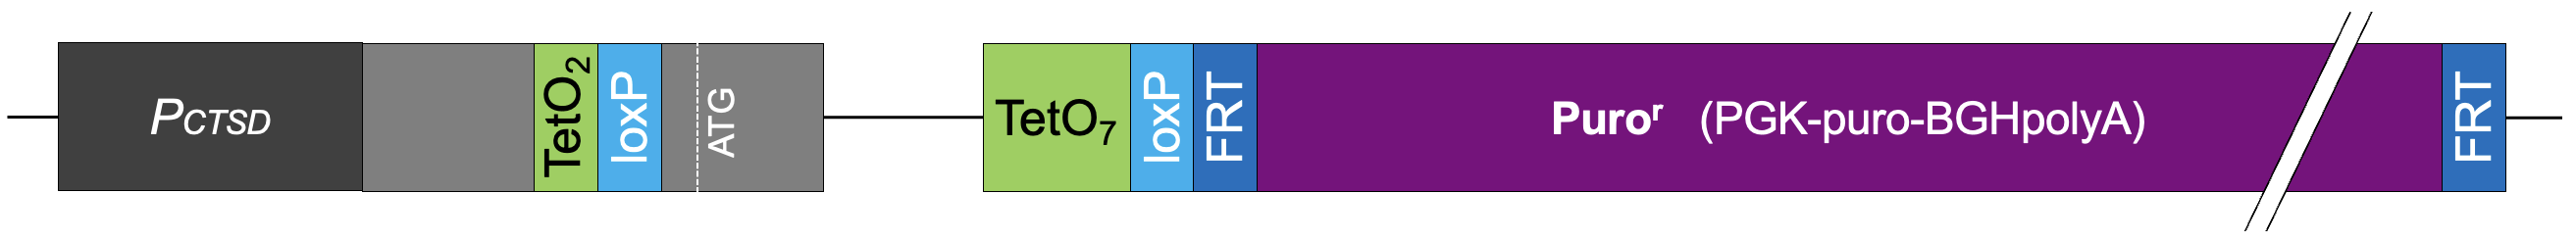
**

Flanking seq: gray text

Homology Arms: purple italic

TATA Box: underlined

EXONS: UPPER CASE

Introns: lower case black

KI region: **bold**

ATG sites: OUTLINED

Stop codons: black box

Spacer seqs: gray highlight

TetO repeats: green highlight

LoxP sites: light blue highlight

FRT sites: blue highlight

PGK-Puror-pA: violet highlight

...gttcgggtcgccccgcccctcgcccgcgtctcacgtgacccgttgagggccaaacaagcgggtcagctgactccgcgggactgcggcgtcatcctgc*ctATAAGCCGGCGACCTCTGGCTTTAAGCTTTGCTCTCTTCGGGCCGCCG*

**CAAGCAGAGCTCtccctatcagtgatagagaTCtccctatcagtgatagagaTCGTCGATAACTTCGTATAAAGTATCCTATACGAAGTTATAGCCGCGACCATGAAGACTCCCGGCGTCTTGCTGCTCATTCTCGGCCTCCTGGCTTCGTCCTCCTTCGCGATTATCAGgtgaggacccgctctgggtccggagatgcggggctcgtcacctggagtgccgcgtcttcactcgagtttactccctatcagtgatagagaacgtatgaagagtttactccctatcagtgatagagaacgtatgcagactttactccctatcagtgatagagaacgtataaggagtttactccctatcagtgatagagaacgtatgaccagtttactccctatcagtgatagagaacgtatctacagtttactccctatcagtgatagagaacgtatatccagtttactccctatcagtgatagagaacgtatgtcgaggtagataacttcgtataaagtatcctatacgaagttatgtagtaataactagtcgaagttcctattctctagaaagtataggaacttcaggtctgaagaggagtttacgtccagccaagctagcttggctgcaggtcgtcgaaattctaccgggtaggggaggcgcttttcccaaggcagtctggagcatgcgctttagcagccccgctgggcacttggcgctacacaagtggcctctggcctcgcacacattccacatccaccggtaggcgccaaccggctccgttctttggtggccccttcgcgccacct**

**Supplementary Figure S2. Targeted region after insertion of TRE-Lox KI insert with Puror cassette (cont'd).**

**tctactcctcccctagtcaggaagttcccccccgccccgcagctcgcgtcgtgcaggacgtgacaaatggaagtagcacgtctcactagtctcgtgcagatggacagcaccgctgagcaatggaagcgggtaggcctttggggcagcggccaatagcagctttgctccttcgctttctgggctcagaggctgggaagggg**

**tgggtccgggggcggggcgggcgcccgaaggtcctccggaggcccggcattctgcacgcttcaaaagcgcacgtctgccgcgctgttctcctcttcctcatctccgggcctttcgacctgcagcctgttgacaattaatcatcggcatagtatatcggcatagtataatacgacaaggtgaggaactaaaccatgaccgagtacaagcccacggtgcgcctcgccacccgcgacgacgtccccagggccgtacgcaccctcgccgccgcgttcgccgactaccccgccacgcgccacaccgtcgatccggaccgccacatcgagcgggtcaccgagctgcaagaactcttcctcacgcgcgtcgggctcgacatcggcaaggtgtgggtcgcggacgacggcgccgcggtggcggtctggaccacgccggagagcgtcgaagcgggggcggtgttcgccgagatcggcccgcgcatggccgagttgagcggttcccggctggccgcgcagcaacagatggaaggcctcctggcgccgcaccggcccaaggagcccgcgtggttcctggccaccgtcggcgtctcgcccgaccaccagggcaagggtctgggcagcgccgtcgtgctccccggagtggaggcggccgagcgcgccggggtgcccgccttcctggagacctccgcgccccgcaacctccccttctacgagcggctcggcttcaccgtcaccgccgacgtcgaggtgcccgaaggaccgcgcacctggtgcatgacccgcaagcccggtgcctgaggggatcaattctctagagctcgctgatcagcctcgactgtgccttctagttgccagccatctgttgtttgcccctcccccgtgccttccttgaccctggaaggtgccactcccactgtcctttcctaataaaatgaggaaattgcatcgcattgtctgagtaggtgtcattctattctggggggtggggtggggcaggacagcaagggggaggattgggaagacaatagcaggcatgctggggatgcggtgggctctatggcttctgaggcggaaagaaccagctggggctcgactagagcttgcggaacccttcgaagttcctattctctagaaagtataggaacttcggcgcgccattt***cggccgtgctggaatgcacctgtgcacccagcgcagccttcctcagggtc*ccacagactatggggcgagacactcaaaaggcaggggtctcctgggcccctctccactcctatgactcctatggtcgaacaggagggtacagt...

**Supplementary Figure S3. Targeted region after Flp recombination to remove Puror cassette.**


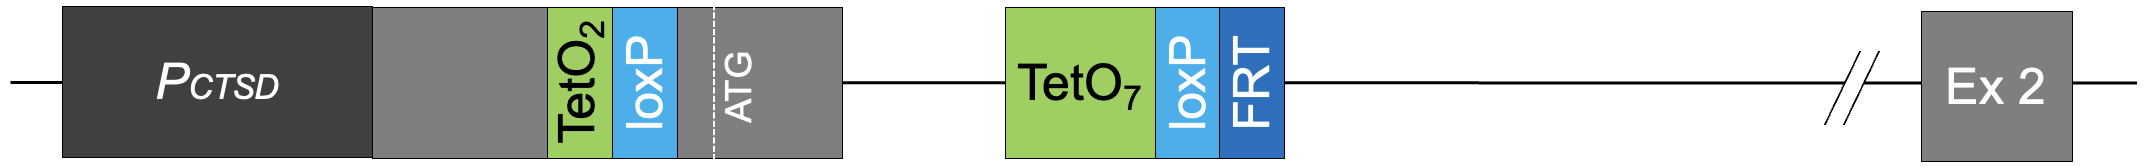


Flanking seq: gray text

Homology Arms: purple italic

TATA Box: underlined

EXONS: UPPER CASE

Introns: lower case black

KI region: **bold**

ATG sites: OUTLINED

Stop codons: black box

Spacer seqs: gray highlight

TetO repeats: green highlight

LoxP sites: light blue highlight

FRT sites: blue highlight

...gttcgggtcgccccgcccctcgcccgcgtctcacgtgacccgttgagggccaaacaagcgggtcagctgactccgcgggactgcggcgtcatcctgc*ctATAAGCCGGCGACCTCTGGCTTTAAGCTTTGCTCTCTTCGGGCCGCCG***CAAGCAGAGCTCtccctatcagtgatagagaTCtccctatcagtgatagagaTCGTCGATAACTTCGTATAAAGTATCCTATACGAAGTTATAGCCGCGACCATGAAGACTCCCGGCGTCTTGCTGCTCATTCTCGGCCTCCTGGCTTCGTCCTCCTTCGCGATTATCAGgtgaggacccgctctgggtccggagatgcggggctcgtcacctggagtgccgcgtcttcactcgagtttactccctatcagtgatagagaacgtatgaagagtttactccctatcagtgatagagaacgtatgcagactttactccctatcagtgatagagaacgtataaggagtttactccctatcagtgatagagaacgtatgaccagtttactccctatcagtgatagagaacgtatctacagtttactccctatcagtgatagagaacgtatatccagtttactccctatcagtgatagagaacgtatgtcgaggtagataacttcgtataaagtatcctatacgaagttatgtagtaataactagtcgaagttcctattctctagaaagtataggaacttcgaagttcctattctctagaaagtataggaacttcggcgcgccattt***cggccgtgctggaatgcacctgtgcacccagcgcagccttcctcagggtc*ccacagactatggggcgagacactcaaaaggcaggggtctcctgggcccctctccactcctatgactcctatggtcgaacaggagggtacagt...

**Supplementary Figure S4. Targeted region after genetic deletion (recombination w/ Flp and Cre).**

**
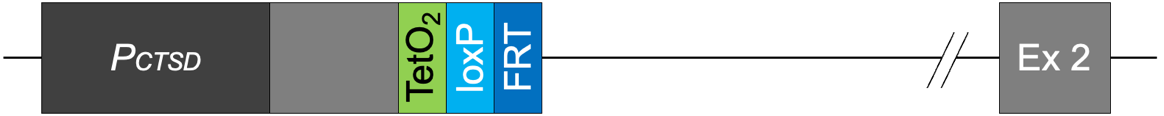
**

Flanking seq: gray

Homology Arms: purple italic

TATA Box: underlined

KI region: **bold black**

ATG sites OUTLINED UPPER CASE

Stop codons: black box

Spacer seqs: gray highlight

TetO repeats: green highlight

LoxP site: light blue highlight

FRT site: blue highlight

...gttcgggtcgccccgcccctcgcccgcgtctcacgtgacccgttgag

ggccaaacaagcgggtcagctgactccgcgggactgcggcgtcatcctgcct*ataagccggcgacctctggctttaagctttgctctcttcgggccgccgcg***gtggaattgctctccctatcagtgatagagatctccctatcagtgatagagatcgtcgataacttcgtataaagtatcctatacgaagttatgtagtaataactagtcgaagttcctattctctagaaagtataggaacttcggcgcgccattt***ctccggccgtgctggaatgcacctgtgcacccagcgcagccttcctcagg*gtcccacagactatggggcgagacactcaaaaggcaggggtctcctgggcccctctccactcctatgactcctatggtcgaacaggagggt...

**Supplementary Figure S5. Genotyping of TL1C8 line by sequencing.**

**a. Alignment of sequencing of upper, TRE-Lox KI PCR amplicon from TL1C8**

**
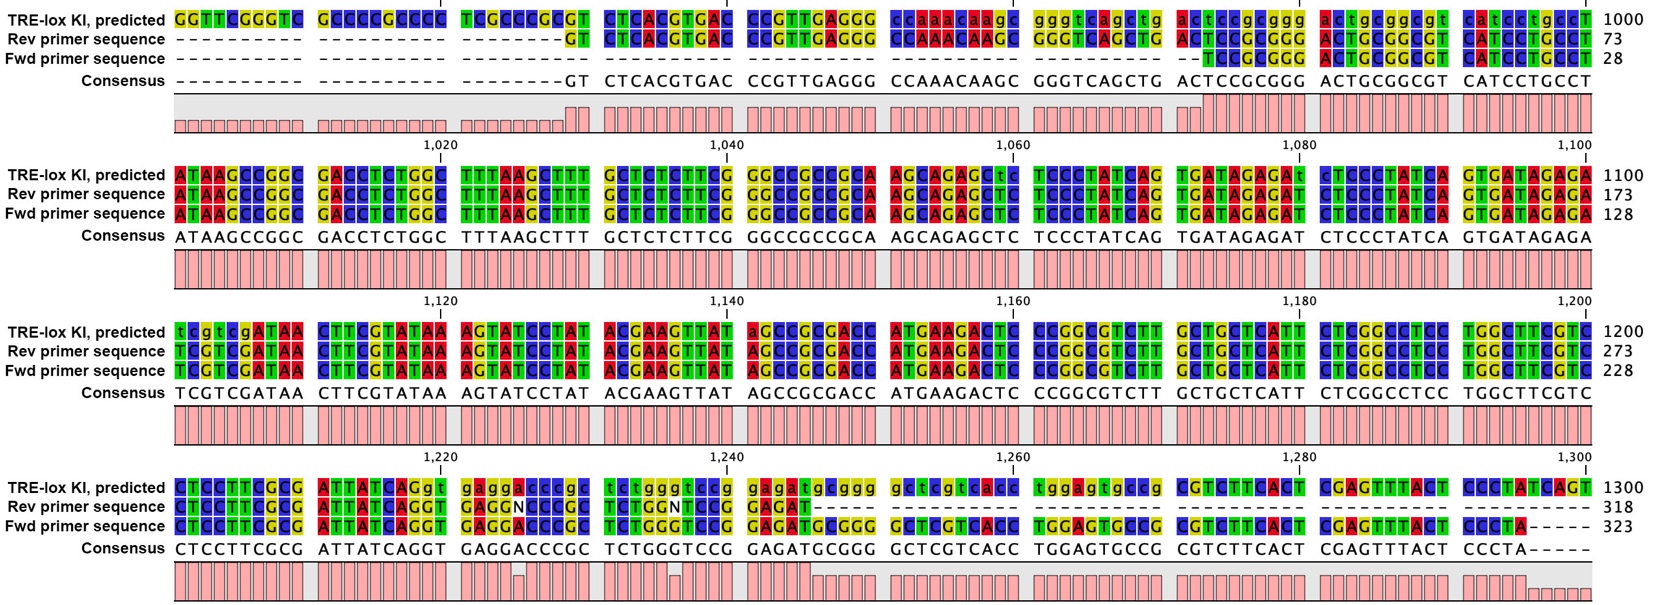
**

**b. Alignment of sequencing of lower, NHEJ PCR amplicon from TL1C8 with WT sequence.**

**
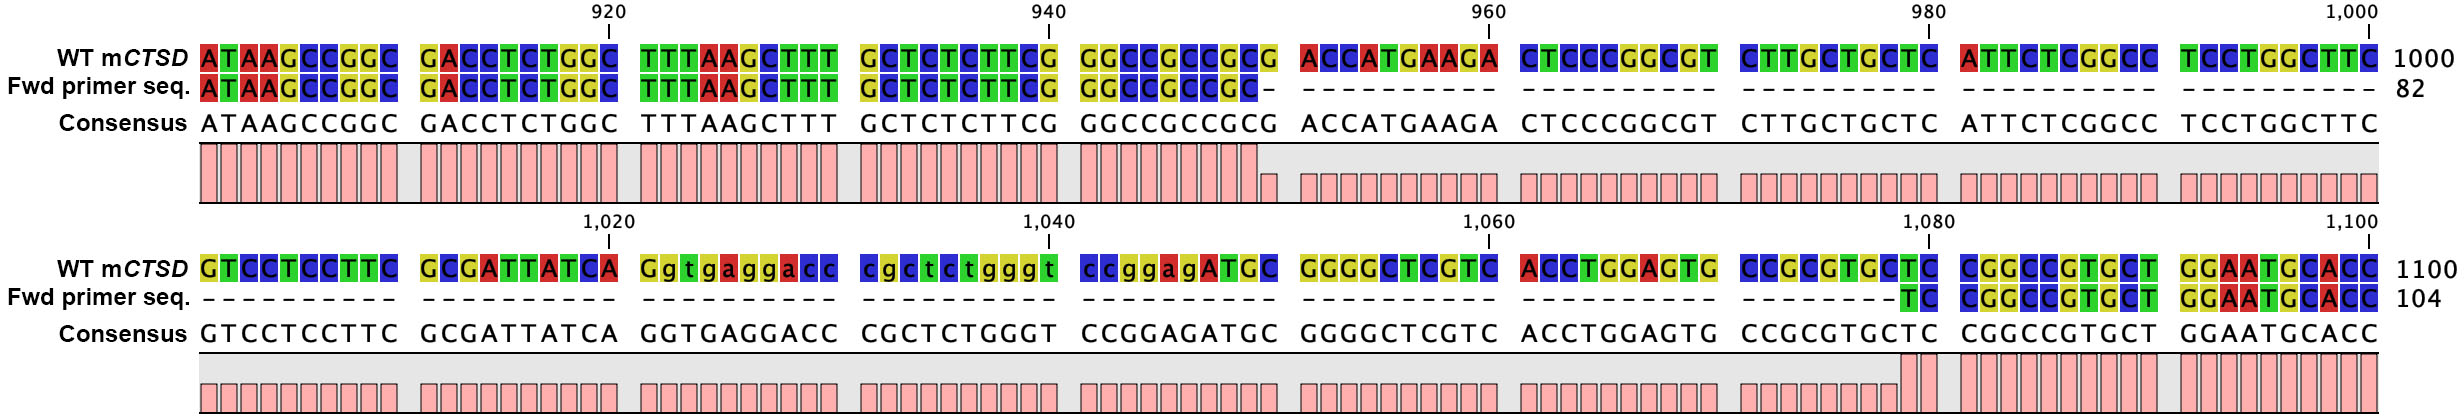
**

**c. Alignment of sequencing of lower, NHEJ PCR amplicon from TL1C8 with predicted NHEJ sequence.**

**
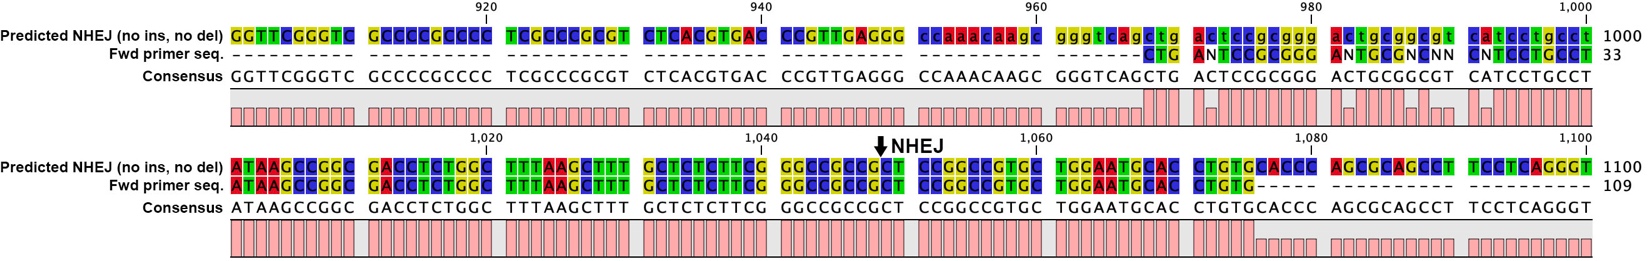
**

**d. Sanger sequencing of lower, NHEJ PCR amplicon from TL1C8 stable clone.
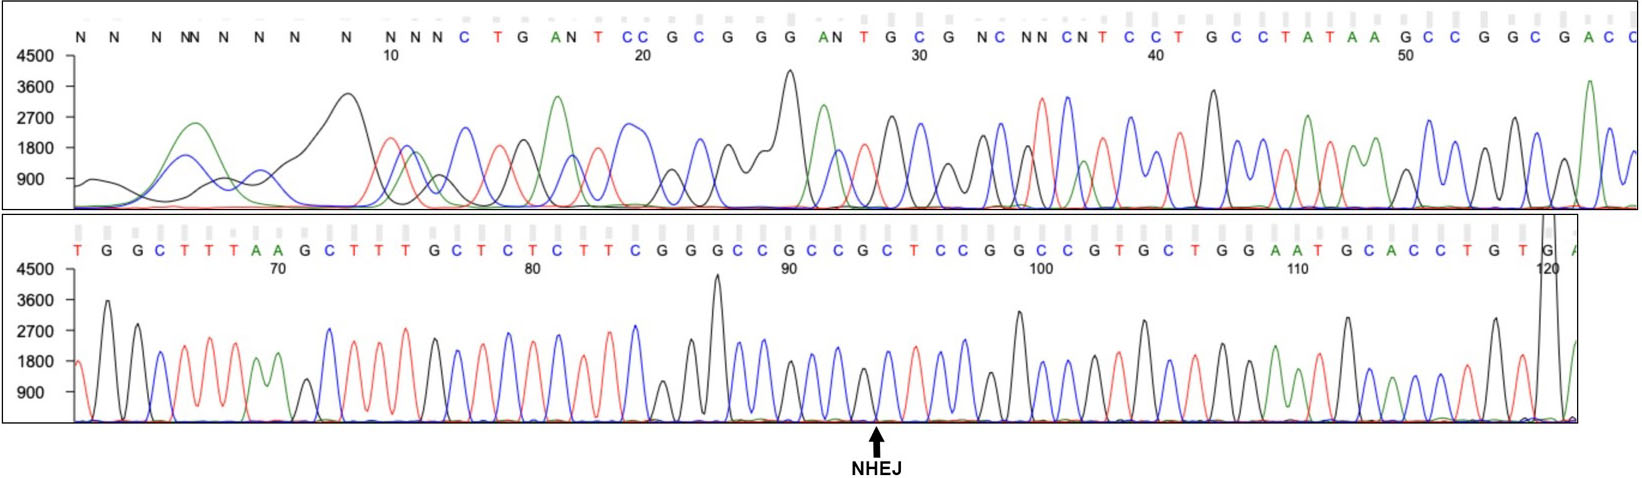
**

**Supplementary Figure S6. PCR verification before vs. after Flp-mediated recombination.**

**a**


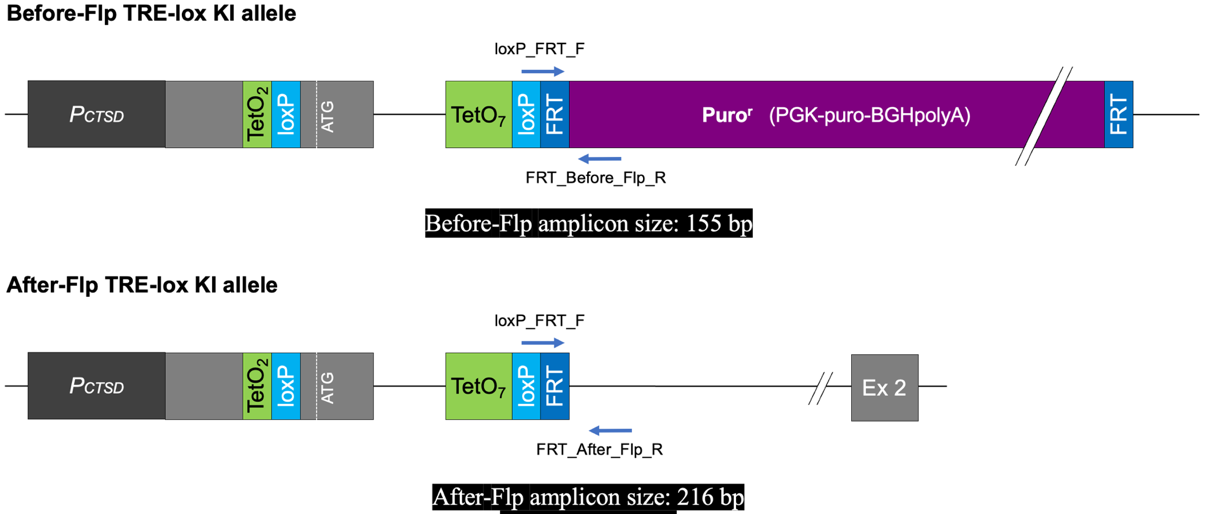


**
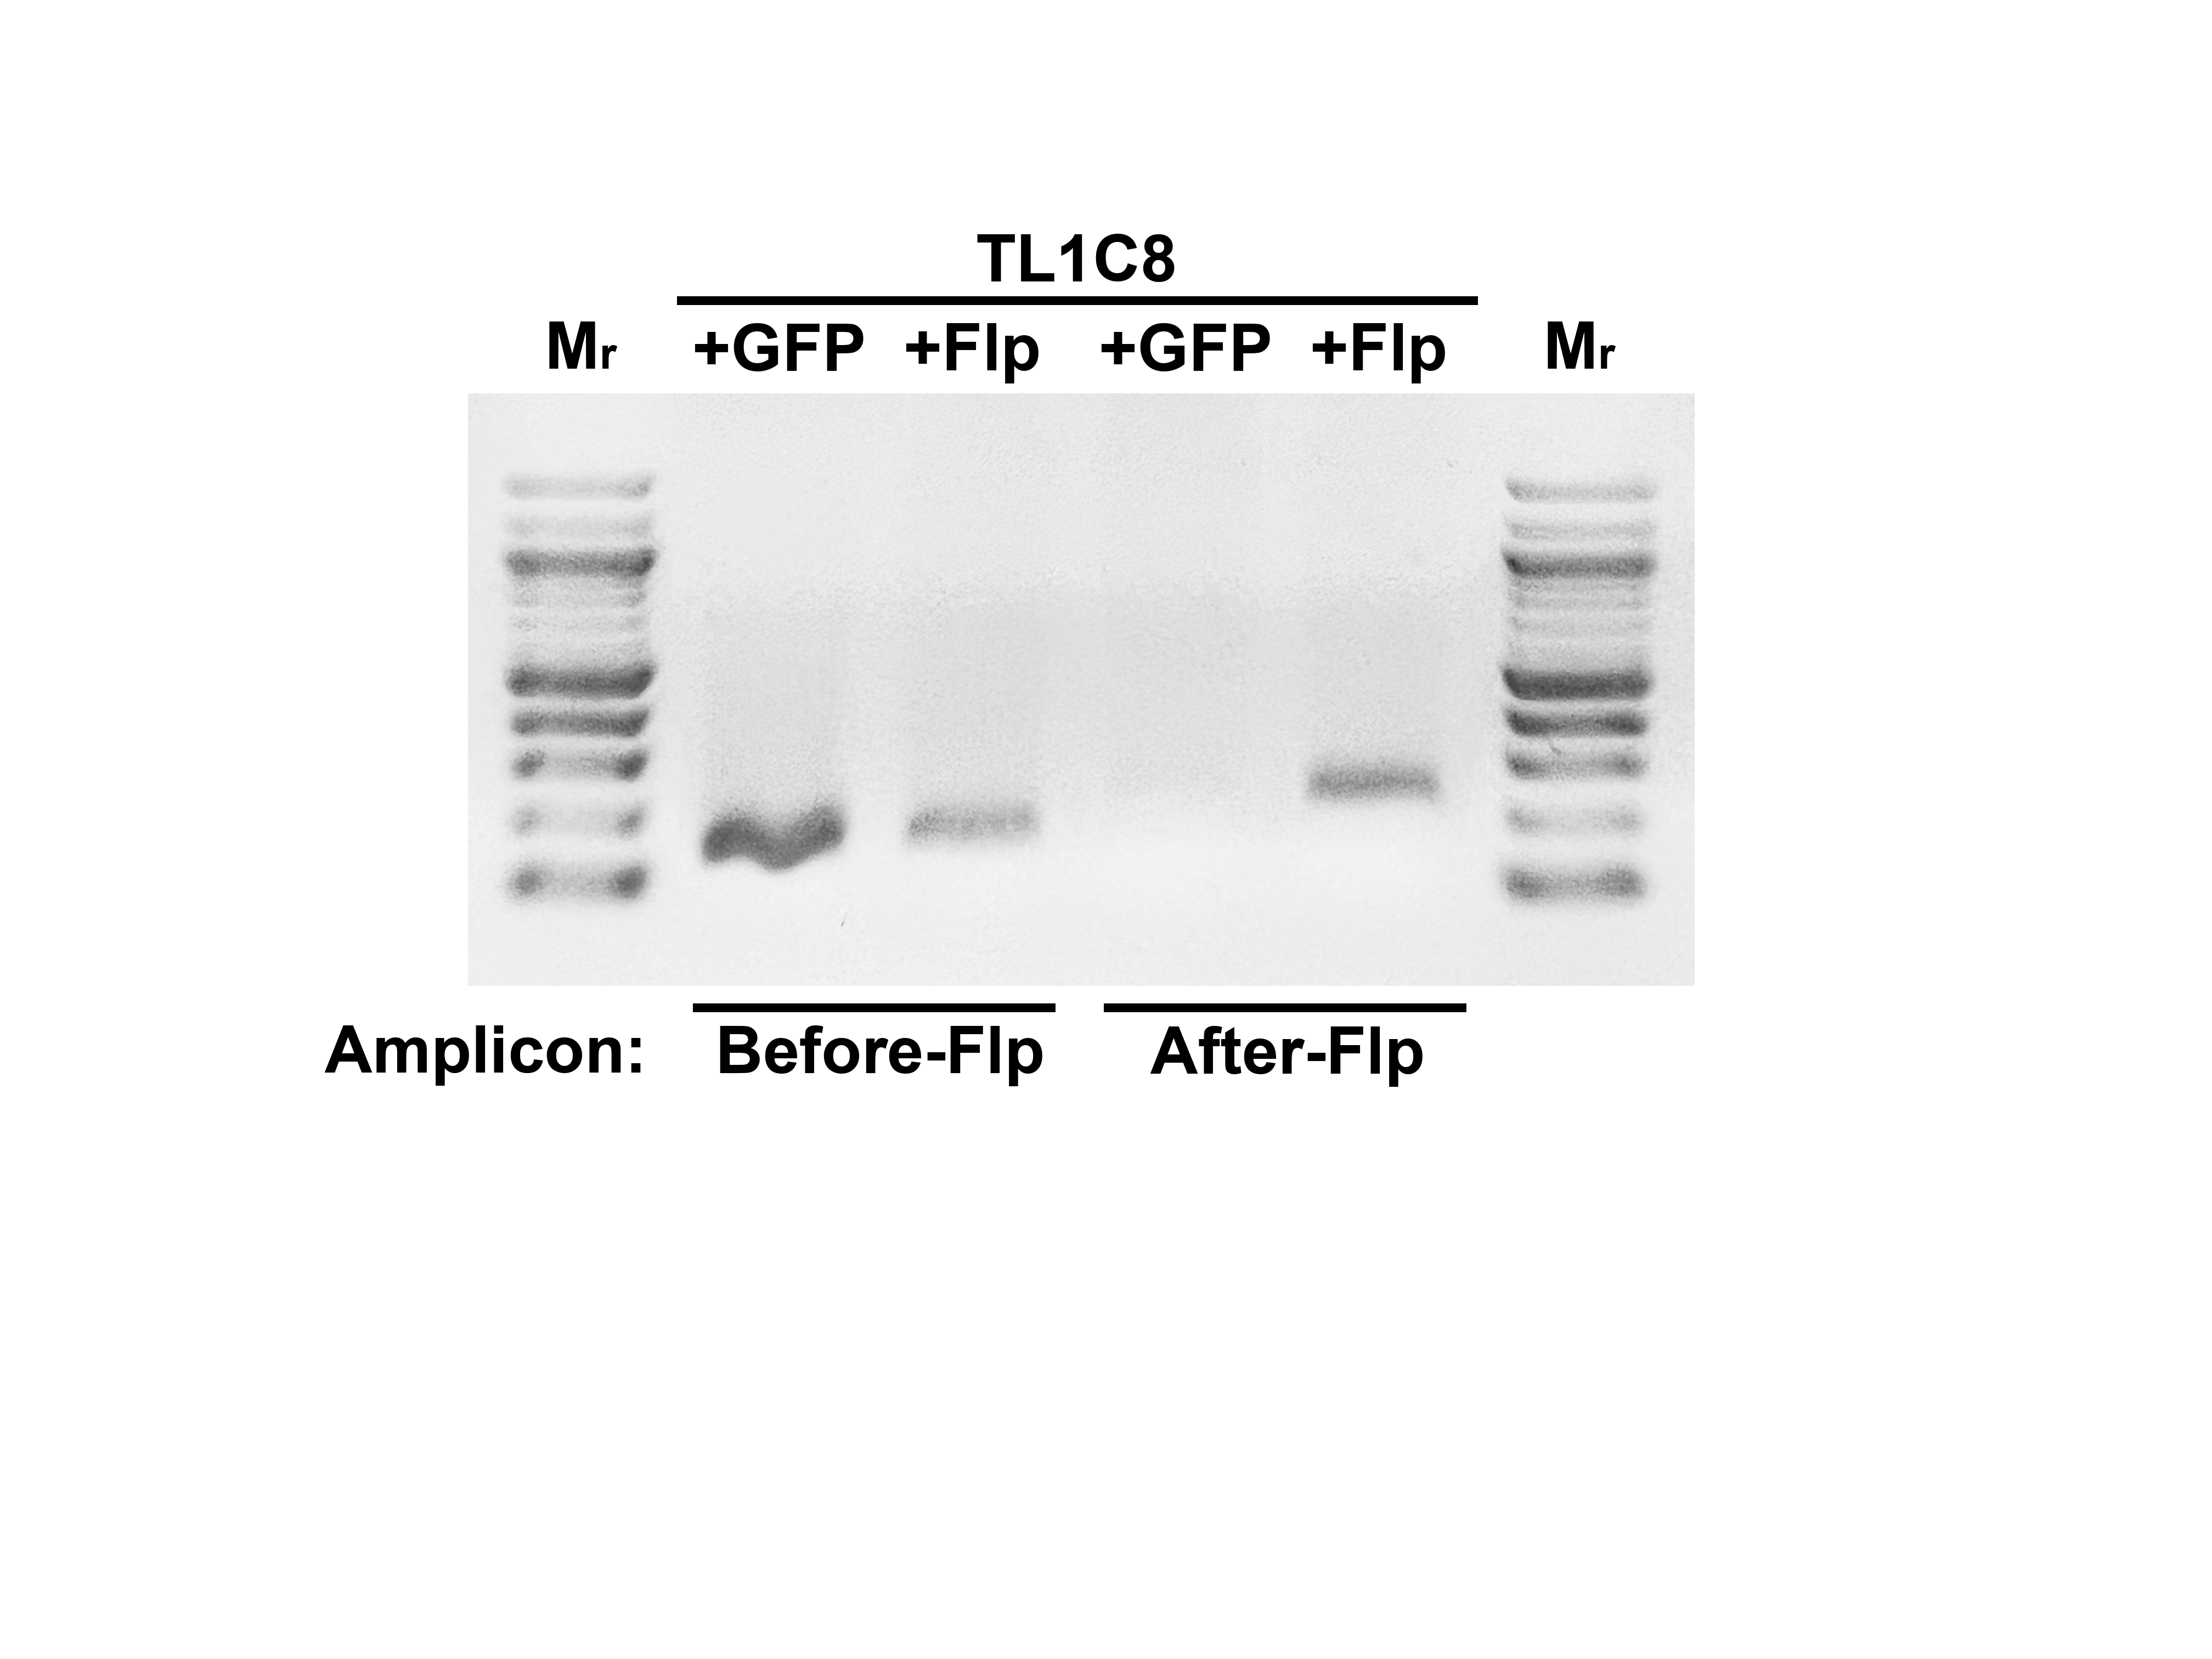
**

**b**

Note: The "After-Flp" amplicon is larger than the "Before-Flp" amplicon because the latter uses a different reverse primer located exclusively within the PuroR cassette.

**Supplementary Figure S7. Dox dose-response curves for stable clones TFR1B11 and TFR2E9.**

**
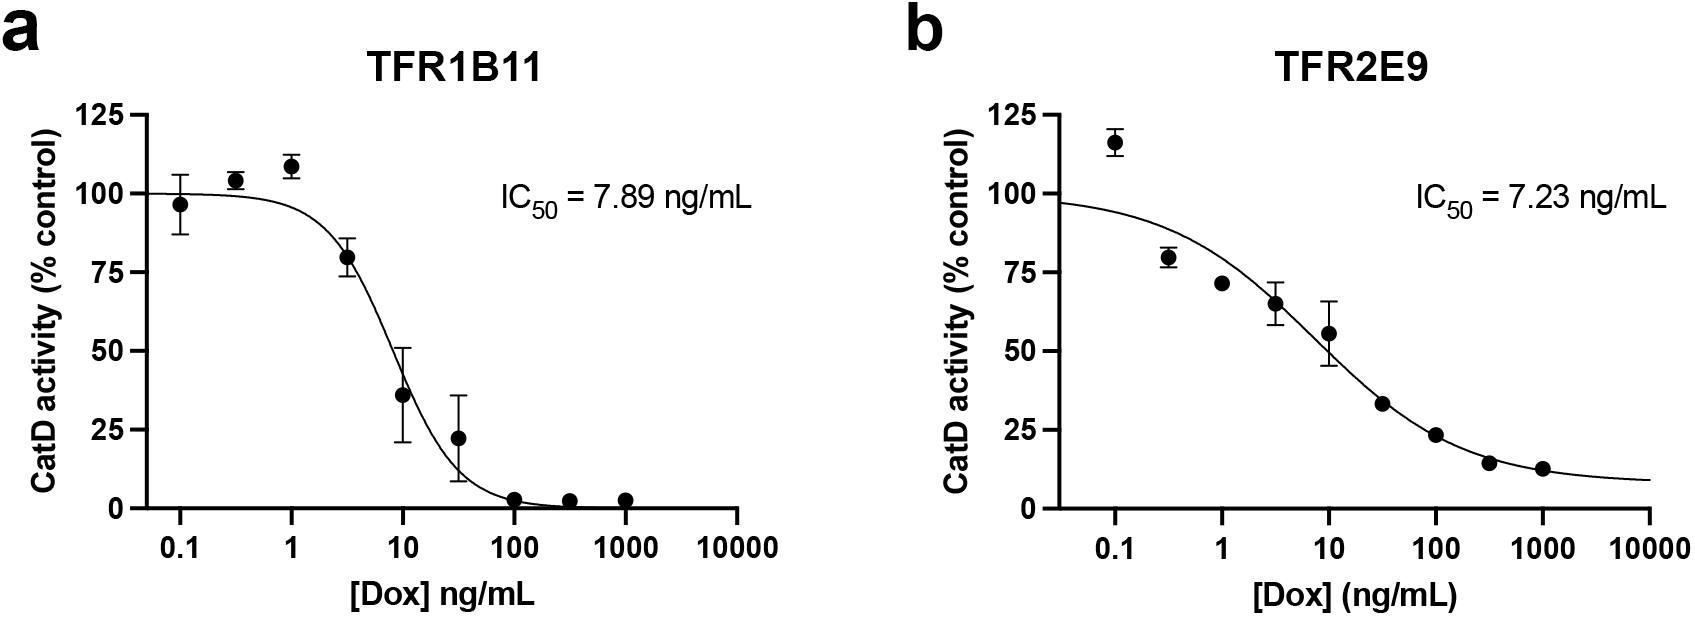
**

**Supplementary Figure S8. Time courses of CatD downregulation in clones TFR1B11 and TFR2E9 after addition of Dox (100 ng/mL).**

**
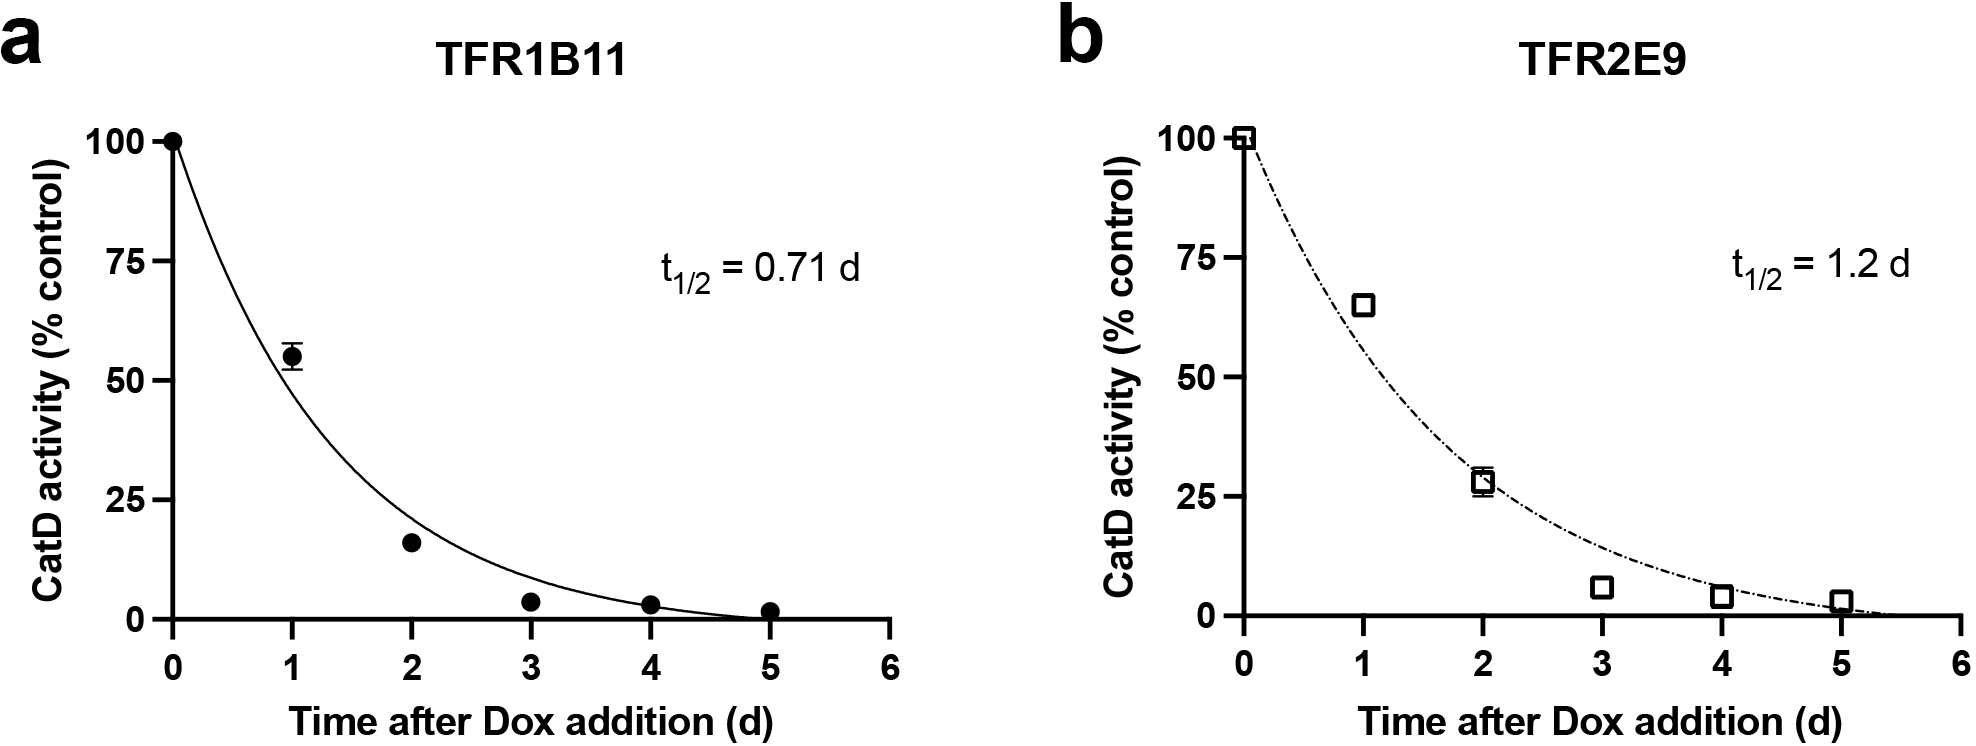
**

**Supplementary Figure S9. Effect of rtTR on CatD activity in the presence and absence of Dox (1000 ng/mL) in transient pools and stable clones of TL1C8-Flp cells.**

**
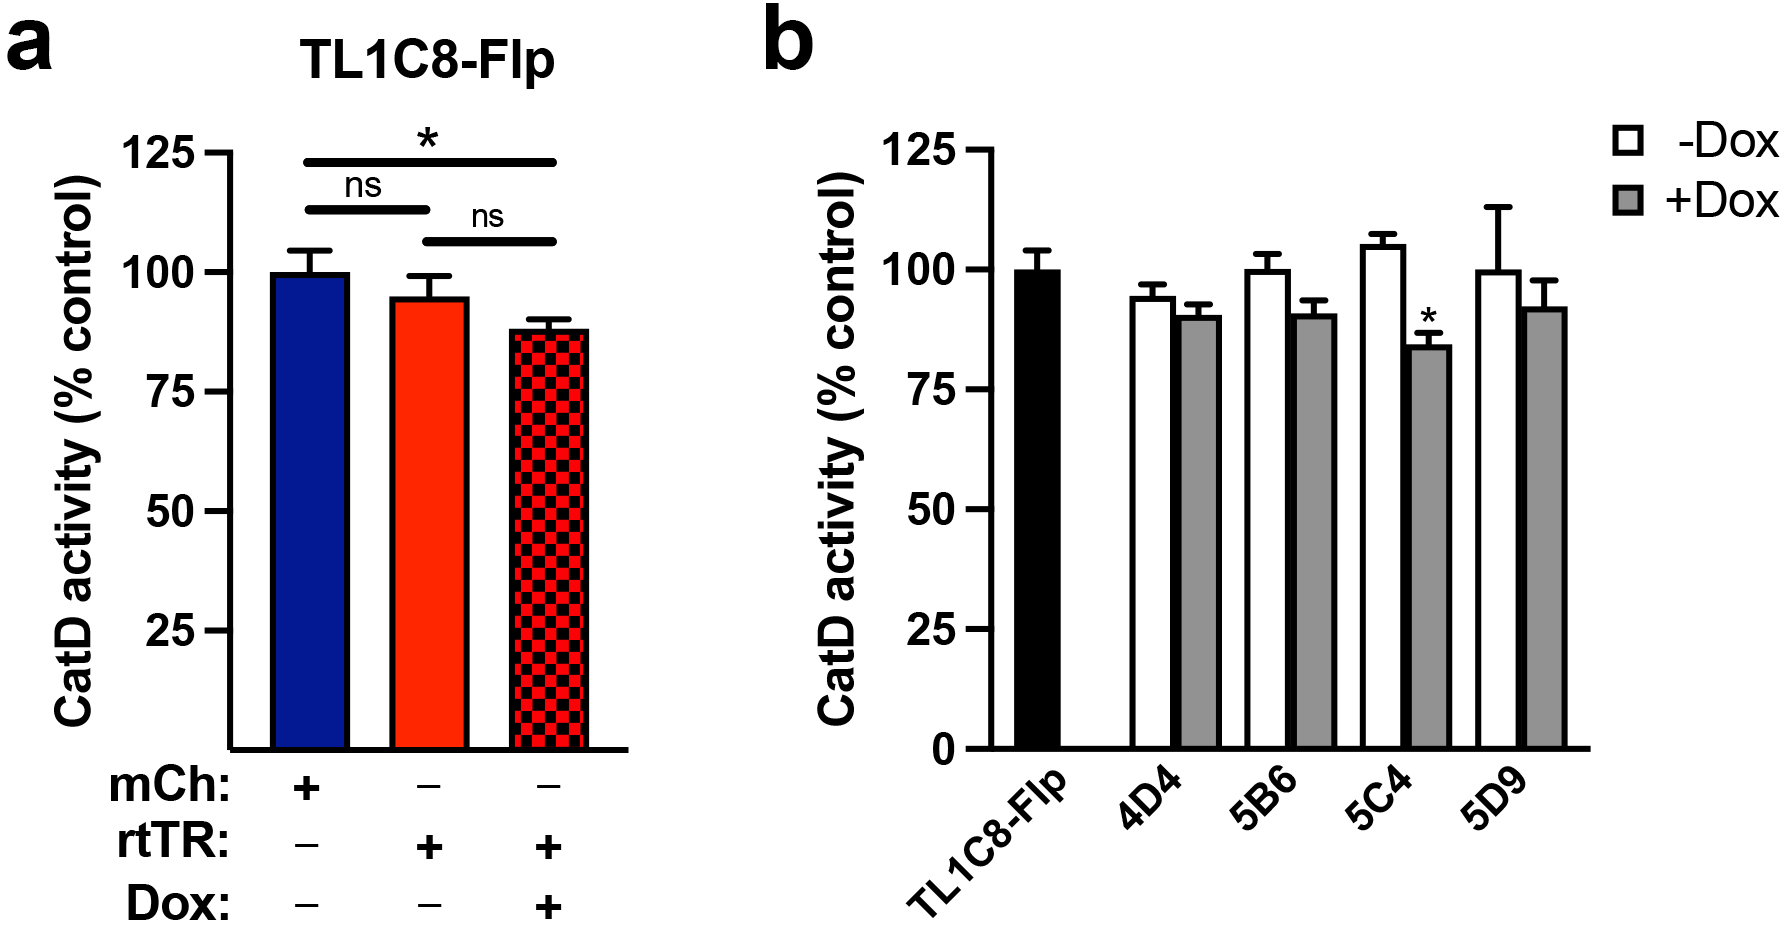
**

**Supplementary Figure S10. Steady-state CatD protein levels in MEFs vs. TFR1D7 cells and in response to Dox addition and withdrawal, using CatD-KO line C1C5 as a control.**

**
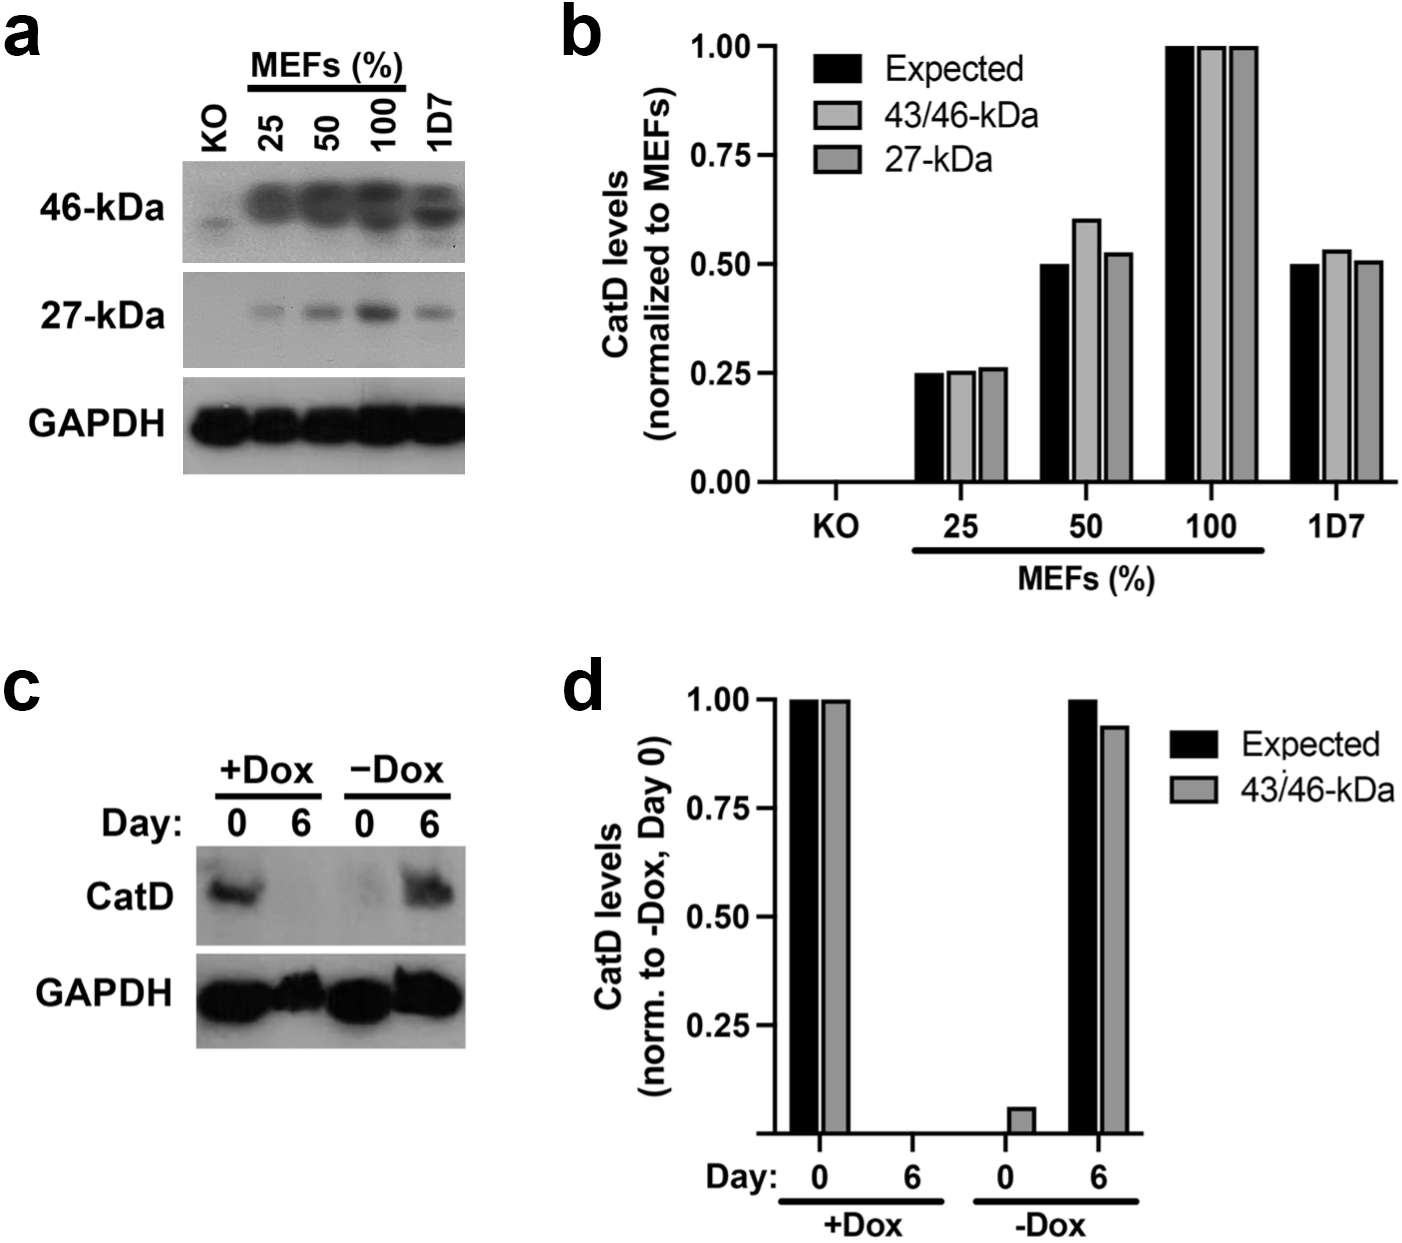
**

**Table S1. Primers used in this study.**

| **Primer name** | **Sequence** | **Purpose** |
| --- | --- | --- |
| gRNA1_top | CACCGGGGAGTCTTCATGGTCGCGG | gRNA1 cloned into px330A-1x2 |
| gRNA1_bottom | AAACCCGCGACCATGAAGACTCCCC | " |
| gRNA2_top | CACCGACCTGGAGTGCCGCGTGCTC | gRNA2 cloned into px330S-2, then px330A-1x2 |
| gRNA2_bottom | AAACGAGCACGCGGCACTCCAGGTC | " |
| Vector_TetO2_F | GTCCAGTGTGGTGGAATTCAAGCAGAGCtCTCCCTATC | cloning of TetO2 for TRE-Lox KI template |
| TetO2_R | CGTATAGGATACTTTATACGAAGTTATCGACGATCTCTATCACTGAT | cloning of TetO2/LoxP sequence for KI template |
| mCTSD_loxP-Ex1_F | CGTATAAAGTATCCTATACGAAGTTATaGCCGCGACCATGAAGACTCC | cloning of LoxP/mCTSD region for KI template |
| mCTSD_3G_In1-2_R | GGAGTAAACTCGAGTGAAGACGCGGCACTCCAGGTGACGAG | cloning of mCTSD region/TRE3G for KI template |
| TRE3G_F | CGTCTTCACTCGAGTTTACTCC | cloning of TRE3G for KI template |
| TRE3G_R | CGACTAGTTATTACTACATAACTTCGTATAGGATACTTTATACGAAGTTATCTACCTCGACATACGTTCTC | cloning of TRE3G/LoxP for KI template |
| LoxP_FRT_F | CGAAGTTATGTAGTAATAACTAGTCGAAGTTCCTATTC | cloning of LoxP/FRT-flanked Puror for KI template/verification of Flp recombination |
| Vector_FRT_R | CCGCCACTGTGCTGGATATCAAATGGCGCGCCGAAGTTCC | cloning of FRT-flanked Puror for KI template |
| 5'HA_mCTSD_TRE-Lox_KI_F | C*T*ATAAGCCGGCGACCTCTGGCTTTAAGCTTTGCTCTCTTCGGGCCGCCGCAAGCAGAGCTCTCCCTATCAGTG | PCR amplifying TRE-Lox KI insert from template  (asterisks denote phosphorothioate bonds) |
| 3'HA_mCTSD_TRE-Lox_KI_R | G*A*CCCTGAGGAAGGCTGCGCTGGGTGCACAGGTGCATTCCAGCACGGCCGAAATGGCGCGCCGAAGTTCC | " |
| mCTSD_WT_prom_F | GCGTCATCCTGCCTATAAGCCGGCG | genotyping of WT vs KI vs NHEJ mCTSD alleles/ verification of Cre recombination |
| mCTSD_WT_2R | GTCTCACGTGACCCGTTGAGG | " |
| mCTSD_TRE-Lox_2R | AACTCGAGTGAAGACGCGGCAC | " |
| FRT_Before_Flp_R | AGCGCATGCTCCAGACTGCC | verification of Flp recombination |
| FRT_After_Flp_R | CCTACTGTACCCTCCTGTTCG | " |
| mCTSD_KI_Cre_verification_R | CTTCGACTAGTTATTACTACATAACTTCG | verification of Cre recombination |
| pICN_KOZ_rtTR(V16)_F | CTTAATACGACTCACTATAGGCTAGCCGCCACCATGTCTAGACTGGACAAGAGC | cloning of rtTR(V9I)/KRAB into pICherryNeo |
| KRAB_rtTR(V16)_R | CGAGCCGCTTTCGCACTTTAGCTG | " |
| rtTR(V16)_KRAB_F | CAGCTAAAGTGCGAAAGCGGCTCGCCAAAAAAGAAGAGAAAGGTCG | " |
| IRES_KRAB_only_R | CTCTAGAGGTACCACGCGTGAATTACACCAGCCAGGGCTCTTCTCC | " |
| DEL_KRAB_69oC_F | TAATTCACGCGTGGTACCTCTAGAG | deletion of KRAB from rtTRKRAB in pICherryNeo |
| DEL_KRAB_69oC_R | GCCGCTTTCGCACTTTAGCTGTTTC | " |
